# Supplementary material for: Network pharmacology and molecular docking study on the mechanism of colorectal cancer treatment using Xiao-Chai-Hu-Tang
Source: PLoS One. 2021 Jun 14;16(6):e0252508. doi: 10.1371/journal.pone.0252508 (PMC8202922; doi:10.1371/journal.pone.0252508)
Supplement: S5 Table — (XLSX) [file pone.0252508.s006.xlsx]

## Sheet: Sheet1
Top 11 of Enrichment Analysis of KEGG Functional
ID	Passways	pvalue	gene	Target Number
hsa04657	IL-17 signaling pathway	5.06539e-08	CXCL10/IL1B/MMP1/MMP9/PTGS2/MMP3	6
hsa04668	TNF signaling pathway	4.65686e-06	CXCL10/IL1B/MMP9/PTGS2/MMP3	5
hsa04620	Toll-like receptor signaling pathway	8.64845e-05	CXCL10/CXCL11/IL1B/SPP1	4
hsa05323	Rheumatoid arthritis	0.00125112	IL1B/MMP1/MMP3	3
hsa05215	Prostate cancer	0.0014131	MMP9/MMP3/PLAU	3
hsa04064	NF-kappa B signaling pathway	0.00172727	IL1B/PTGS2/PLAU	3
hsa05171	Coronavirus disease - COVID-19	0.00182659	CXCL10/IL1B/MMP1/MMP3	4
hsa01523	Antifolate resistance	0.00233853	ABCG2/IL1B	2
hsa00350	Tyrosine metabolism	0.00314623	ADH1C/MAOA	2
hsa05219	Bladder cancer	0.00406654	MMP1/MMP9	2
hsa04060	Cytokine-cytokine receptor interaction	0.00436847	CXCL10/CXCL11/IL1B/TNFSF15	4
